# Supplementary figures and images for: Caveolin‐1 promotes cancer progression via inhibiting ferroptosis in head and neck squamous cell carcinoma
Source: PubMed Central journal article supplement — J Oral Pathol Med. 2021 Dec 19;51(1):52–62. doi: 10.1111/jop.13267 (PMC9300096; doi:10.1111/jop.13267), 2021-12-19

# Supplementary Figure 1

**A**

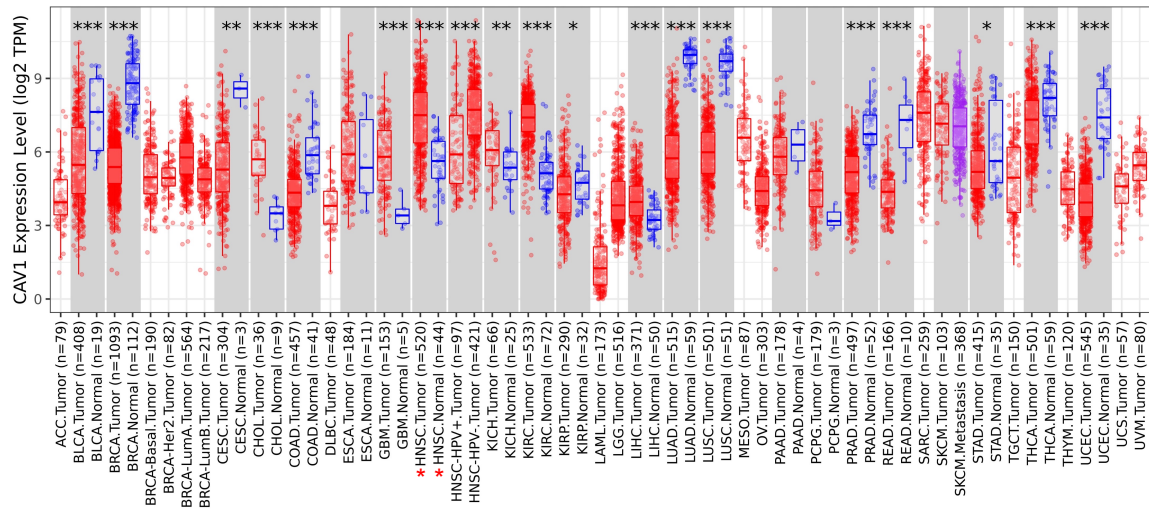

**B**

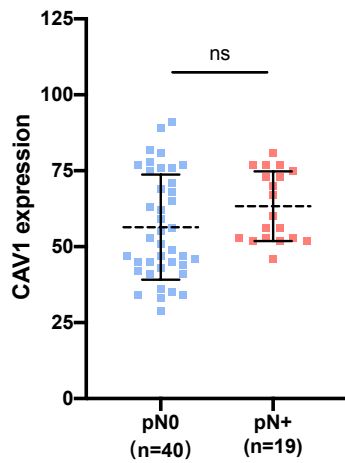

**C**

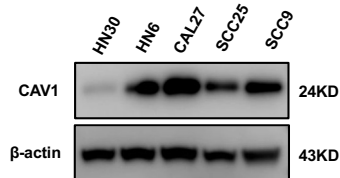

**D**

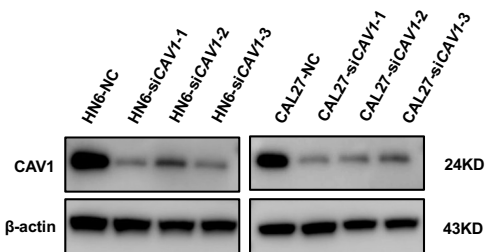

Supplement: JOP-51-52-s001.pdf [file JOP-51-52-s001.pdf]
